# Supplementary material for: HPV infection alters vaginal microbiome through down-regulating host mucosal innate peptides used by Lactobacilli as amino acid sources
Source: PubMed Central journal article supplement (PMC8885657; doi:10.1038/s41467-022-28724-8), 2022-02-28
Supplement: 41467_2022_28724_MOESM1_ESM.pdf [file 41467_2022_28724_MOESM1_ESM.pdf]

## Supplementary information

### HPV infection alters vaginal microbiome through down-regulating host mucosal innate peptides used by *Lactobacilli* as amino acid sources

Alizee Lebeau<sup>1\*</sup>, Diane Bruyere<sup>1\*</sup>, Patrick Roncarati<sup>1</sup>, Paul Peixoto<sup>2,3</sup>, Eric Hervouet<sup>2,3</sup>, Gael Cobraiville<sup>4</sup>, Bernard Taminiou<sup>5</sup>, Murielle Masson<sup>6</sup>, Carmen Gallego<sup>7</sup>, Gabriel Mazzucchelli<sup>8</sup>, Nicolas Smargiasso<sup>8</sup>, Maximilien Fleron<sup>8,9</sup>, Dominique Baiwir<sup>8,9</sup>, Elodie Hendrick<sup>1</sup>, Charlotte Pilard<sup>1</sup>, Thomas Lerho<sup>1</sup>, Celia Reynders<sup>1</sup>, Marie Ancion<sup>1</sup>, Roland Greimers<sup>10</sup>, Jean-Claude Twizere<sup>11</sup>, Georges Daube<sup>5</sup>, Geraldine Schlecht-Louf<sup>7</sup>, Françoise Bachelerie<sup>7</sup>, Jean-Damien Combes<sup>12</sup>, Pierrette Melin<sup>13</sup>, Marianne Fillet<sup>4</sup>, Philippe Delvenne<sup>1,10</sup>, Pascale Hubert<sup>1</sup> and Michael Herfs<sup>1</sup>

<sup>1</sup>Laboratory of Experimental Pathology, GIGA-Cancer, University of Liege, 4000 Liege, Belgium

<sup>2</sup>INSERM, EFS BFC, UMR 1098, Interactions Hôte-Greffon-Tumeur/Ingénierie Cellulaire et Génique, University of Bourgogne Franche-Comté, 25000 Besançon, France

<sup>3</sup>EPIGENEXP platform, University of Bourgogne Franche-Comté, 25000 Besançon, France

<sup>4</sup>Laboratory for the Analysis of Medicines, Center for Interdisciplinary Research on Medicines (CIRM), University of Liege, 4000 Liege, Belgium

<sup>5</sup>Department of Food Sciences-Microbiology, Fundamental and Applied Research for Animals and Health (FARAH), Faculty of Veterinary Medicine, University of Liege, 4000 Liege, Belgium

<sup>6</sup>Ecole Supérieure de Biotechnologie Strasbourg, UMR 7242, CNRS, University of Strasbourg, 67412 Illkirch, France

<sup>7</sup>INSERM UMR 996, Inflammation Microbiome and Immunosurveillance, University of Paris-Saclay, 92140 Clamart, France

<sup>8</sup>Laboratory of Mass Spectrometry, Department of Chemistry, University of Liege, 4000 Liege, Belgium

<sup>9</sup>GIGA Proteomic Facility, University of Liege, 4000 Liege, Belgium

<sup>10</sup>Department of Pathology, University Hospital Center of Liege, 4000 Liege, Belgium

<sup>11</sup>Laboratory of Signaling and Protein Interactions, GIGA-Molecular Biology of Diseases, University of Liege, 4000 Liege, Belgium

<sup>12</sup>Infections and Cancer Epidemiology Group, International Agency for Research on Cancer, World Health Organization, 69372 Lyon, France

<sup>13</sup>Department of Clinical Microbiology, University Hospital Center of Liege, 4000 Liege, Belgium

\*These authors contributed equally: Alizee Lebeau and Diane Bruyere.

Authors to whom correspondence, proofs and reprint requests should be sent:

Michael Herfs, PhD

Laboratory of Experimental Pathology, GIGA-Cancer, B23 +4

University of Liege

4000 Liege

Belgium

Email: M.Herfs@uliege.be

1. University Hospital of Liege
2. Citadelle Regional Hospital
3. ND Bruyeres
4. Bois de l'abbaye Hospital
5. Regional Hospital of Huy

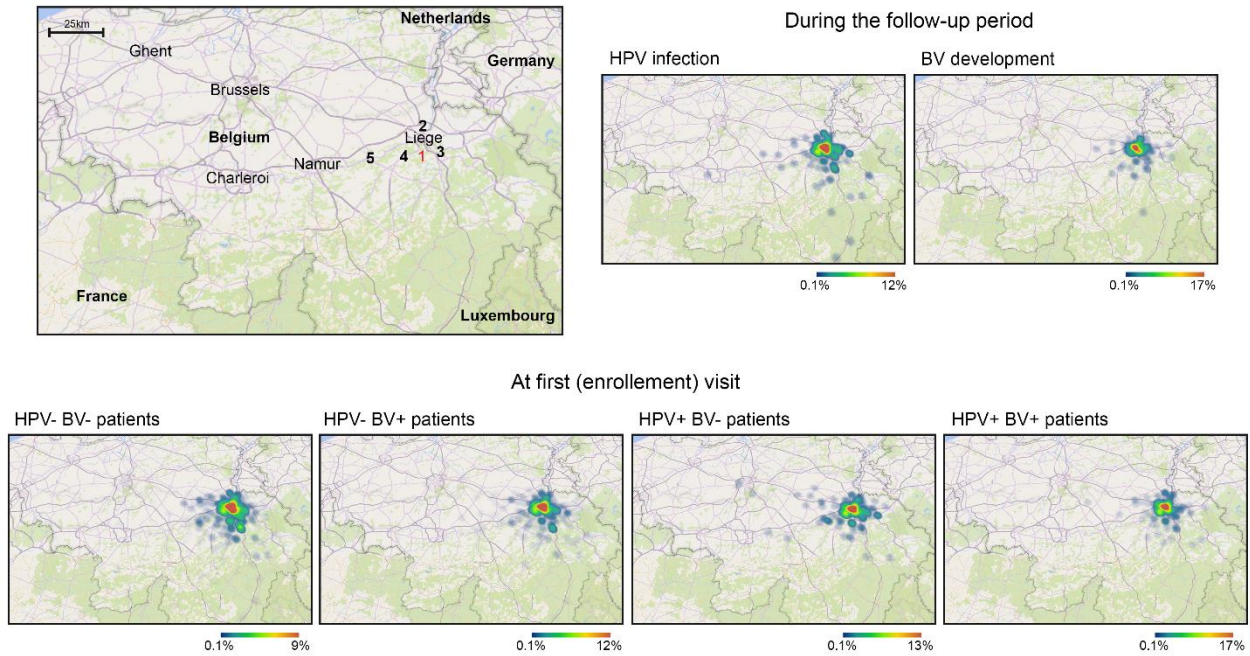

**Supplementary Figure 1. Geographic distribution of patients (6,045/6,085, 99.3%) evaluated in the present retrospective cohort analysis.** Of note, the large majority of patients lived within a 50km radius around Liege (Belgium) and no obvious difference in terms of geographic repartition of patients was noticed between the defined groups. Source data are provided as a Source Data file.

## LL-37

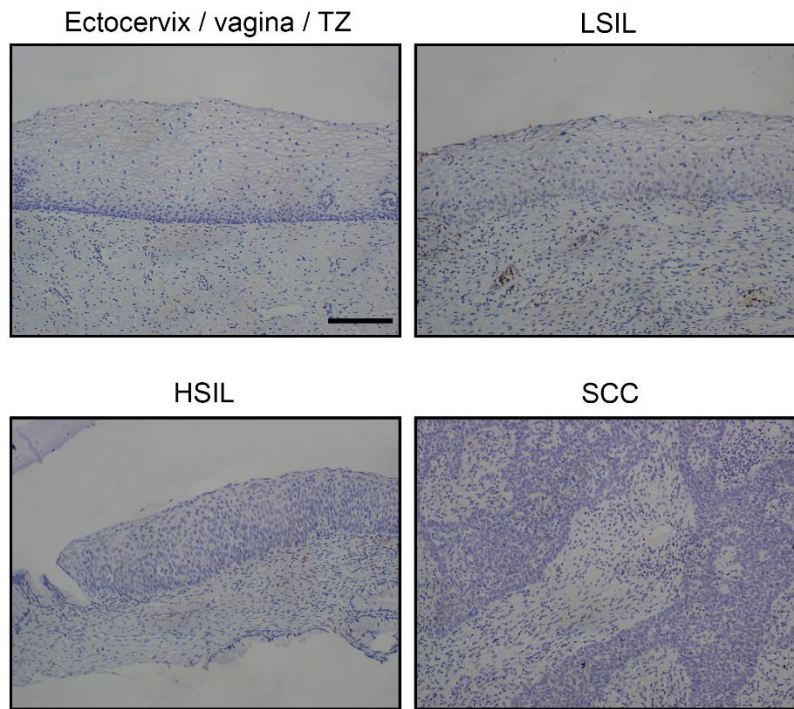

**Supplementary Figure 2. Representative examples of anti-LL-37 immunoreactivity displayed by both normal squamous epithelium (ectocervix/vagina) and HPV-positive (pre)neoplastic lesions.** Note the absence of LL-37 expression in epithelial compartment. Twenty HPV-negative tissue specimens and 45 HPV-related (pre)neoplastic lesions (LSIL, n=15; HSIL, n=15; SCC, n=15) were stained. TZ: transformation zone; SIL: squamous intraepithelial lesion; SCC: squamous cell carcinoma. The scale bar represents 100  $\mu$ m.

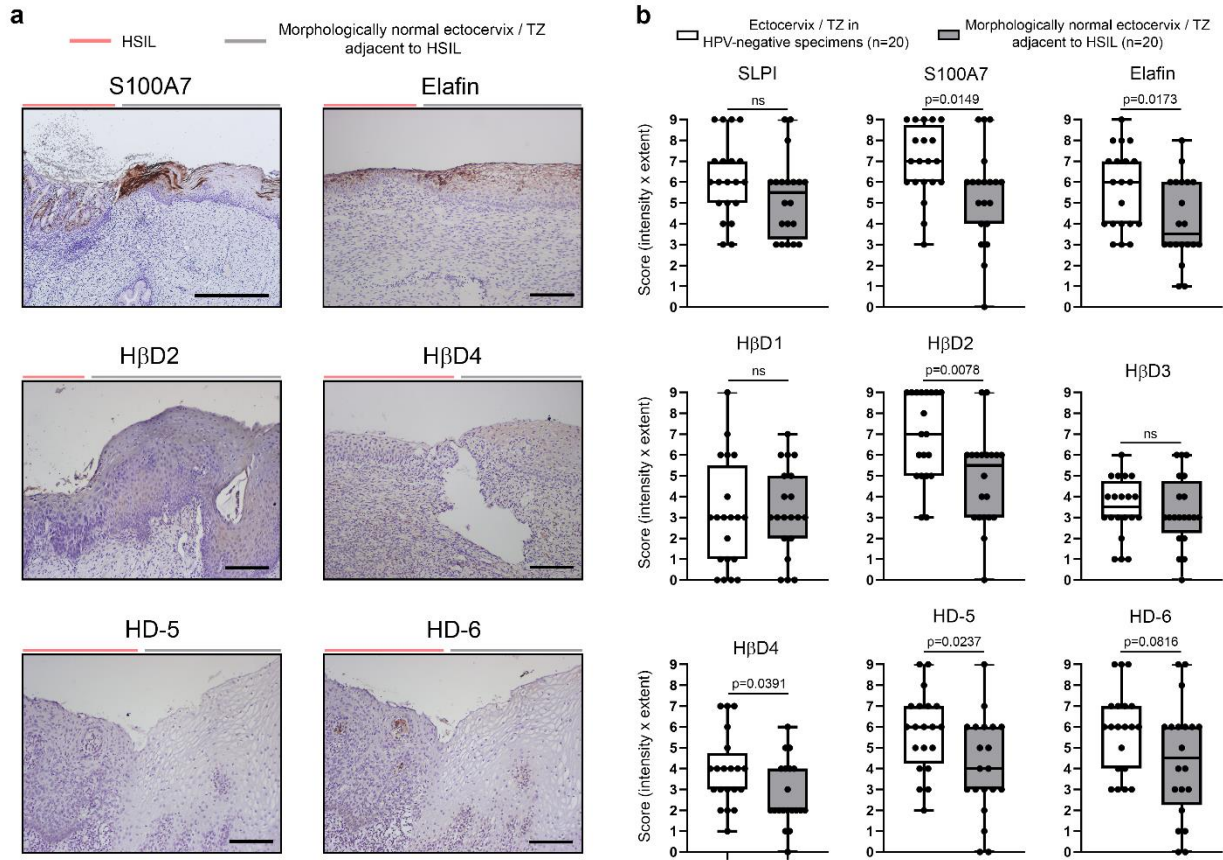

**Supplementary Figure 3. Morphologically normal squamous epithelia adjacent to HPV-positive (pre)neoplastic lesions display a reduced expression of several innate (antimicrobial) peptides.** **a** Representative pictures of morphologically normal ectocervix / TZ adjacent to CIN 2/3 stained for S100A7, elafin, HβD2, HD-5 and HD-6. **b** Semi-quantitative evaluation of innate peptide expression (intensity and extent of the immunostaining) in normal squamous epithelia from HPV-negative specimens (n=20, individual data from Figure 2F) and morphologically normal tissues adjacent to CIN 2/3 (n=20). The significantly reduced anti-S100A7, anti-elafin, anti-HβD2, anti-HβD4 and anti-HD-5 immunoreactivities should be noticed. Box limits: 25th to 75th percentiles; line: median; whiskers: minimum to maximum. The scale bar represents 100 μm. *P* values were determined using two-sided Mann-Whitney test. ns: not significant ( $p < 0.1$ ). Source data are provided as a Source Data file.

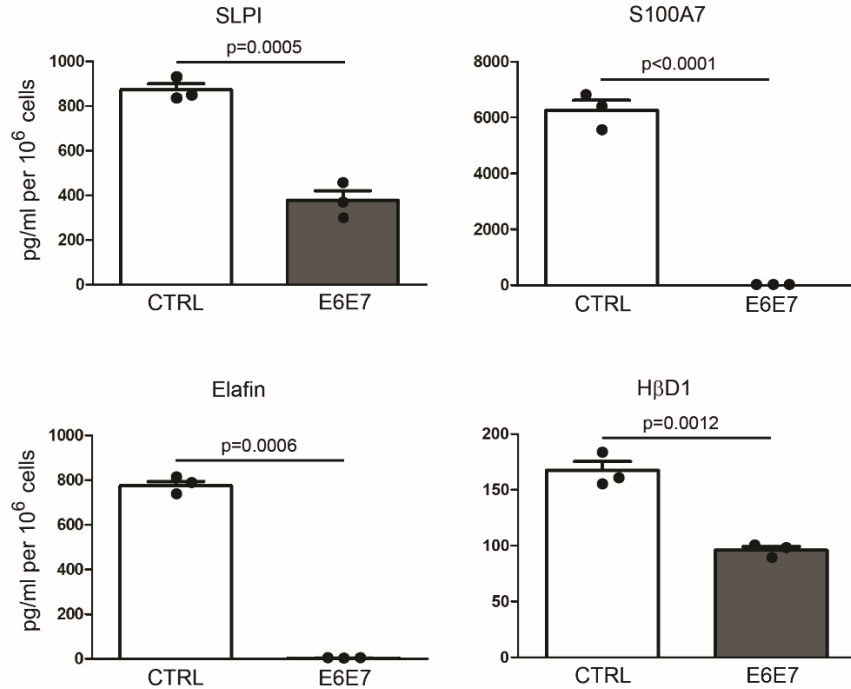

**Supplementary Figure 4. Secretion of defensin-like peptides (SLPI, elafin, S100A7) and HβD1 analyzed by ELISA.** Note the drastic reduced secretion of these four so called “constitutive” peptides in case of HPV16 E6E7 transduction. Results represent the means ± SEM of three independent experiments. *P* values were determined using two-sided unpaired *t*-tests. Source data are provided as a Source Data file.

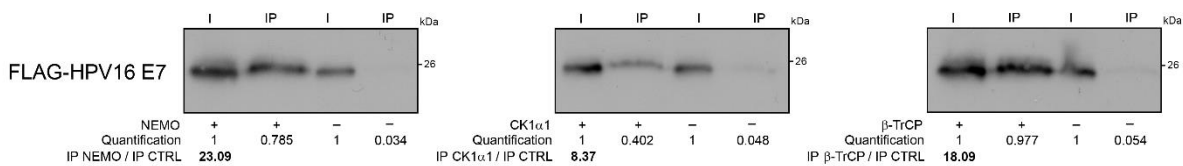

**Supplementary Figure 5. Validation of HPV16 E7-NEMO, E7-CK1 and E7-β-TrCP interactions by co-IP in the inverse direction.** In contrast to the results presented in the main Figures 3 and 4, anti-NEMO, anti-CK1α1 and anti-β-TrCP antibodies were used for the immunoprecipitation step. FLAG-E7 was then detected. Note the clear enrichments supporting the bindings highlighted by GPCA. Each co-IP analysis was independently performed twice and one representative experiment is shown. Source data are provided as a Source Data file.

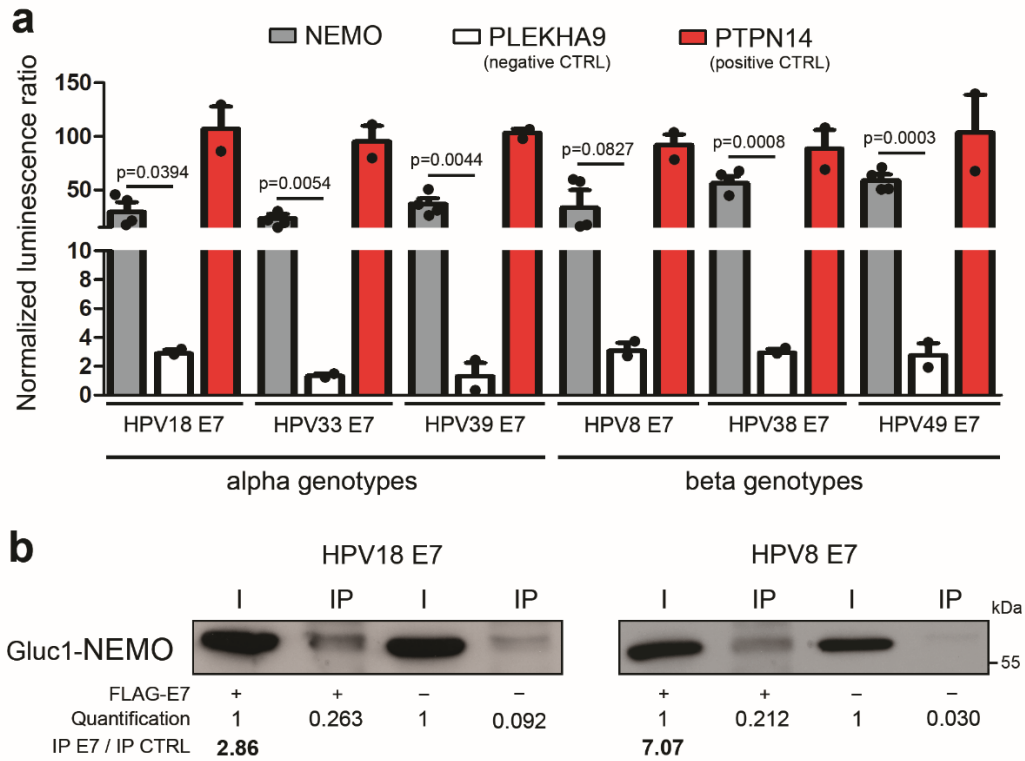

**Supplementary Figure 6. Binding of NEMO with E7 oncoprotein from six different HPV genotypes (high-risk alpha: HPV16, 18, 33 and 39; beta: HPV8, 38 and 49) analyzed by GPCA (a) and confirmed by co-IP (b).** For the GPCA experiments, PTPN14 and PLEKHA9 were used as positive and negative control, respectively. Results represent the means  $\pm$  SEM of two (PTPN14 and PLEKHA9) or four (NEMO) independent experiments. Each co-IP analysis was independently performed twice and one representative experiment is shown. *P* values were determined using two-sided unpaired *t*-tests. Source data are provided as a Source Data file.



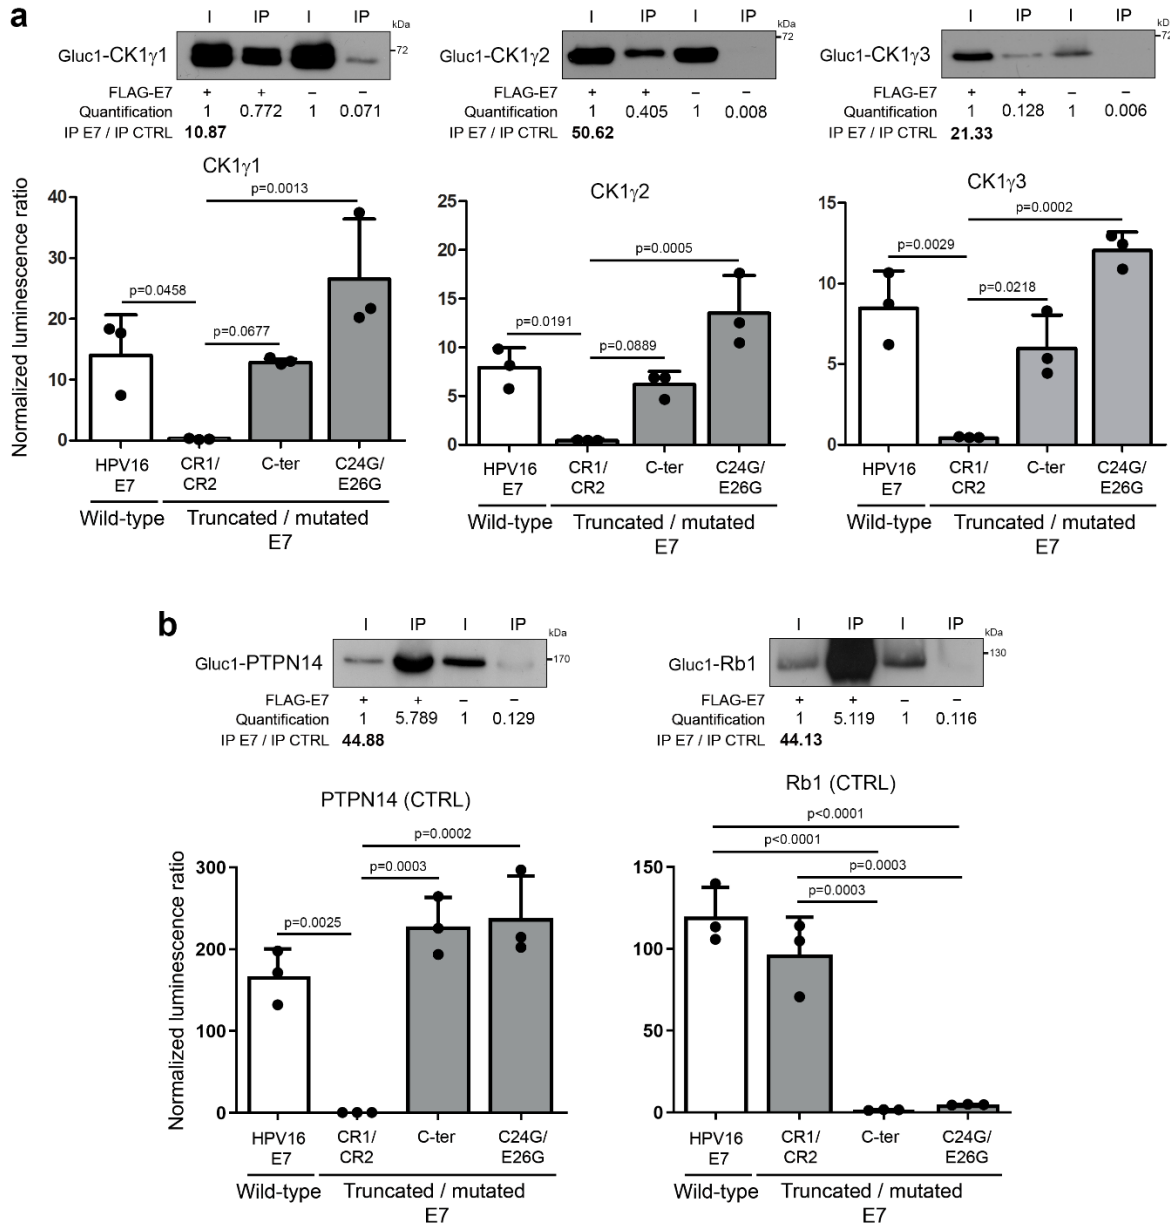

**Supplementary Figure 7. Interaction between gamma isoforms ( $\gamma$ 1-3) of CK1 and HPV16 E7 oncoprotein.** **a** The bindings were validated by both Co-IP and GPCA using the truncated/mutated forms of E7. Of note, the GPCA signal was drastically reduced with the CR1+CR2 construct, supporting that CK1 $\gamma$ 1, CK1 $\gamma$ 2 and CK1 $\gamma$ 3 interact with the C-terminal region of E7. Results represent the means  $\pm$  SEM of three independent experiments. **b** PTPN14 and Rb1 were systematically used as positive control for binding to the C-terminal region and the LxCxE motif (included in the N-terminal half) of E7, respectively. Results represent the means  $\pm$  SEM of three independent experiments. Each co-IP analysis was independently performed twice and one representative experiment is shown. *P* values were determined using one-way ANOVA followed by Bonferroni post-hoc test. Source data are provided as a Source Data file.

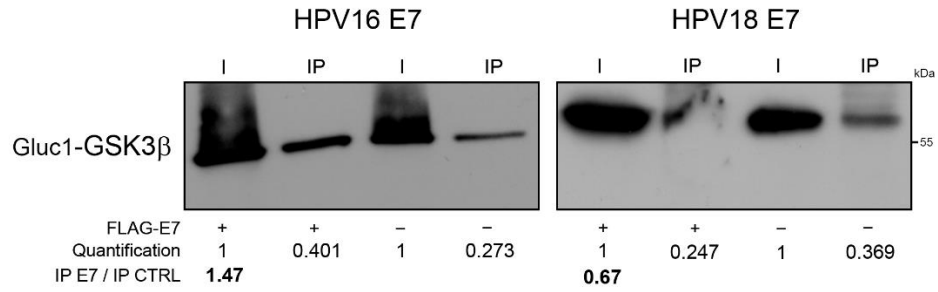

**Supplementary Figure 8. Co-IP of GSK3 $\beta$  with E7 oncoprotein from HPV16 and 18.** Note the absence of clear enrichment suggesting that GSK3 $\beta$  represents a false positive of the GPCA screening method. Each co-IP analysis was independently performed twice and one representative experiment is shown. Source data are provided as a Source Data file.



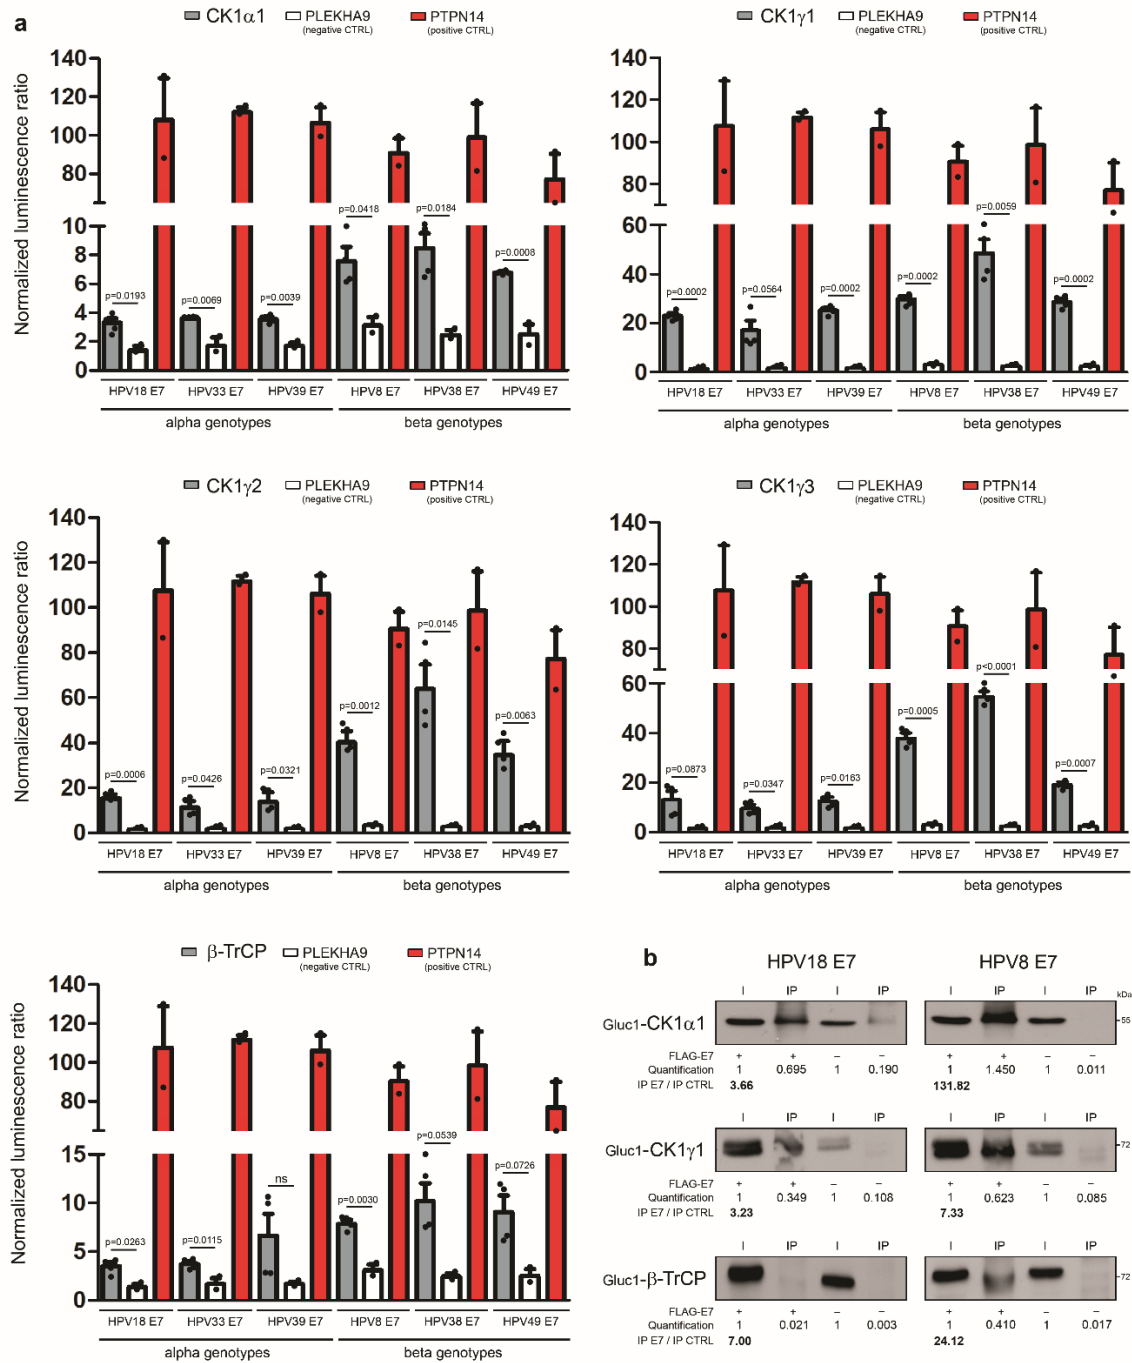

**Supplementary Figure 9. Binding of alpha and gamma isoforms of CK1 and  $\beta$ -TrCP with E7 oncoprotein from six different HPV genotypes (high-risk alpha: HPV16, 18, 33 and 39; beta: HPV8, 38 and 49) analyzed by GPCA (a) and confirmed by co-IP (b).** For the GPCA experiments, PTPN14 and PLEKHA9 were used as positive and negative control, respectively. Results represent the means  $\pm$  SEM of two (PTPN14 and PLEKHA9) or four (CK1 isoforms and  $\beta$ -TrCP) independent experiments. Each co-IP analysis was independently performed twice and one representative experiment is shown. *P* values were determined using two-sided unpaired *t*-tests. ns: not significant ( $p < 0.1$ ). Source data are provided as a Source Data file.

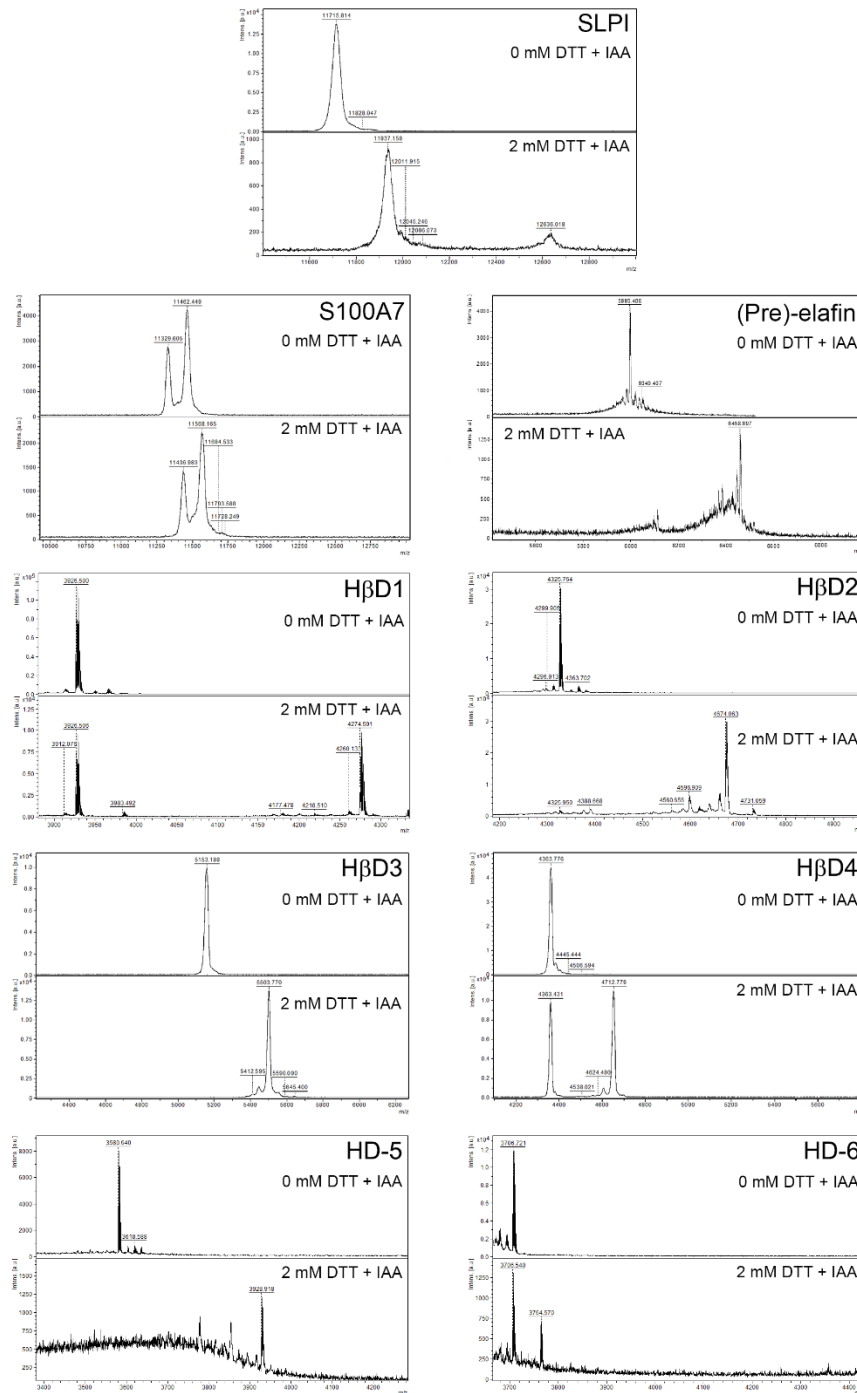

**Supplementary Figure 10. MALDI-TOF mass spectra of oxidized innate peptides incubated with or without DTT (2mM) and alkylated with iodoacetamide (IAA).** In addition to the chemical reduction of the disulfide bridges, both the synthesis and the purity of each tested peptide was examined.

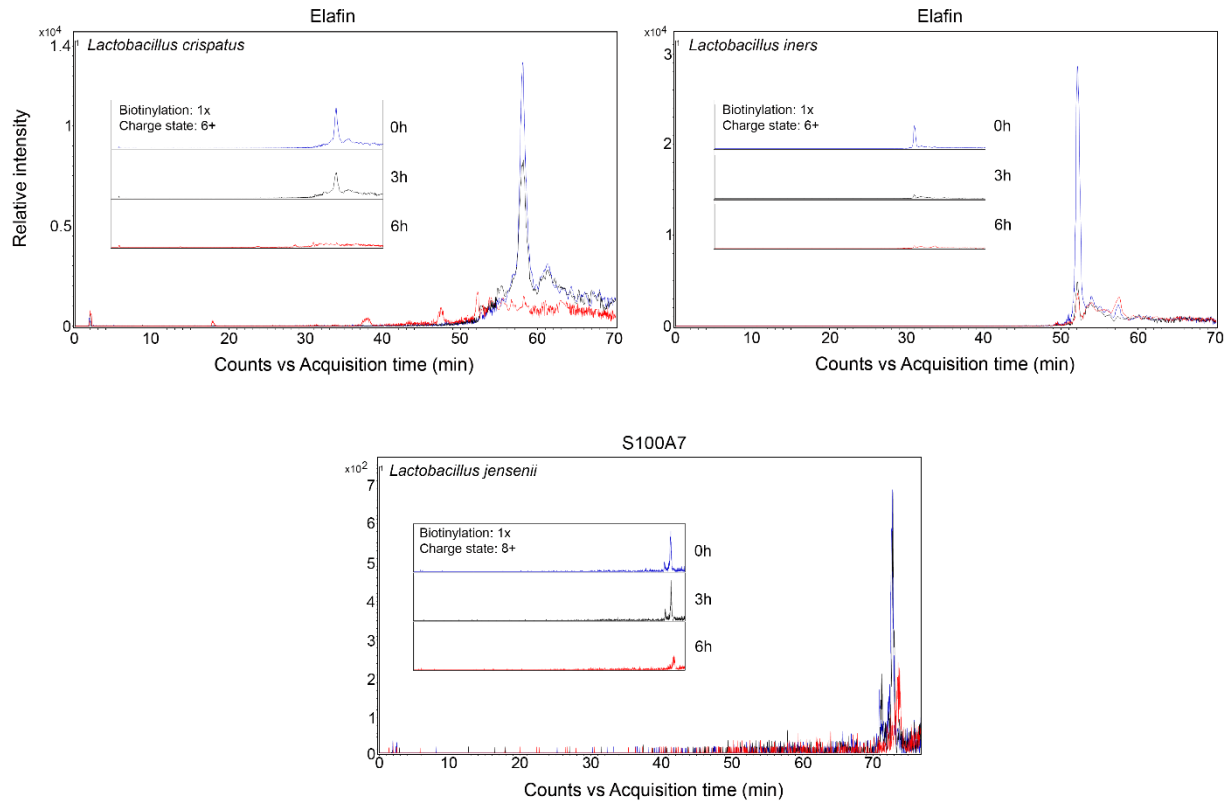

**Supplementary Figure 11. Dominant *Lactobacillus* species constituting the vaginal microbiome hydrolyze some innate peptides highly secreted by host mucosa. Note the nearly complete disappearance of native elafin/S100A7 after 6h of incubation with lactic acid bacteria (*L. crispatus*, *L. jensenii* and *L. iners*).**

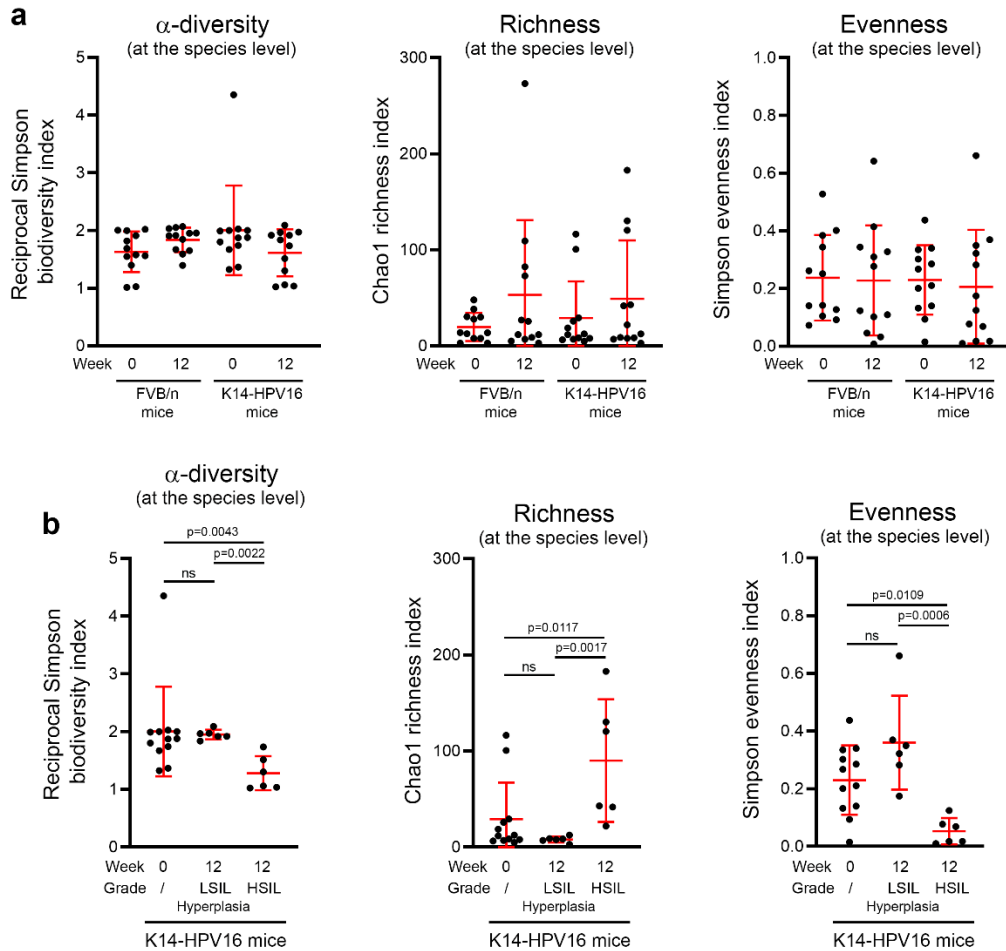

**Supplementary Figure 12. Bacterial intrinsic diversity, richness and evenness at the species level.** Each individual value in the four defined groups [FVB/n (week 0 versus week 12) and K14-HPV16 (week 0 versus week 12)] (a) or only in K14-HPV16 mice (b) are shown (n=12 per group). Significant decreases in bacterial diversity and evenness as well as an increased bacterial richness in K14-HPV16 mice displaying a high-grade squamous intraepithelial lesion (HSIL, n=6) were observed. The means  $\pm$  SD are represented. *P* values were determined using Kruskal-Wallis test corrected with a two-stage linear step-up procedure of Benjamini, Krieger and Yekutieli. ns: not significant ( $p < 0.1$ ). Source data are provided as a Source Data file.

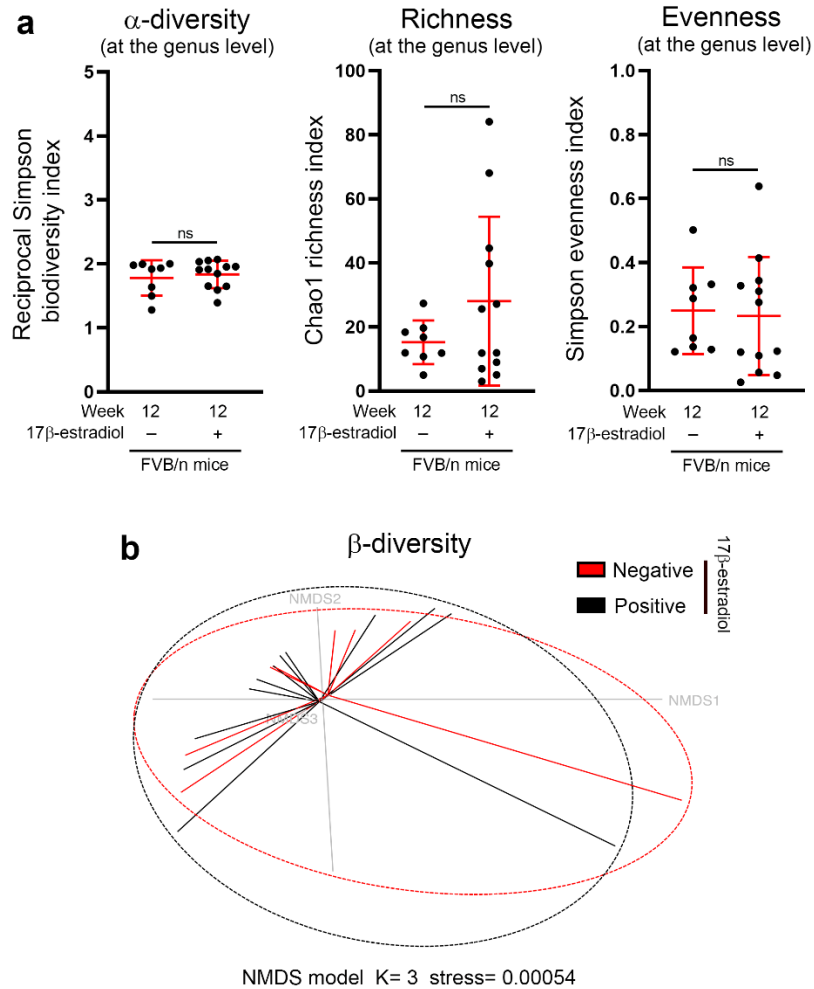

**Supplementary Figure 13. Long-term estrogen treatment does not modify the composition of murine vaginal microbiota.** **a** Bacterial  $\alpha$ -diversity, richness and evenness (at the genus level) for FVB/n mice treated (n=12) or not (n=8) with 17 $\beta$ -estradiol (1-2  $\mu$ g/24h) during 12 weeks were compared. The means  $\pm$  SD are represented. **b**  $\beta$ -diversity of the vaginal microbial profile was visualized using a non-metric multidimensional scaling (NMDS) model. An absence of group clustering was clearly observed. *P* values were determined using Mann-Whitney test. ns: not significant ( $p < 0.1$ ). Source data are provided as a Source Data file.

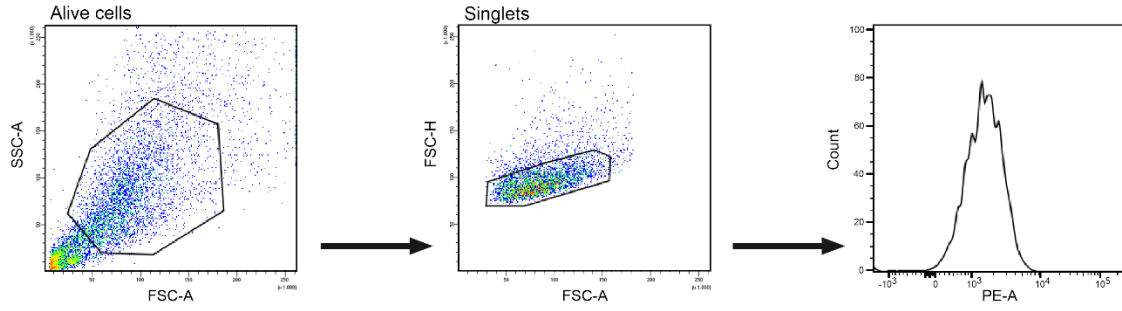

**Supplementary Figure 14.** Gating strategy used in flow cytometry analysis experiments.

## Supplementary Table 1. PCR primers used in the present study

### Human qRT-PCR

|              |         |                                        |
|--------------|---------|----------------------------------------|
| SLPI         | Forward | GCA TCA AAT GCC TGG ATC CT             |
|              | Reverse | GCA TCA AAC ATT GGC CAT AAG TC         |
| S100A7       | Forward | TTC CCC AAC TTC CTT AGT GCC            |
|              | Reverse | GGC GAG GTA ATT TGT GCC CT             |
| Elafin       | Reverse | GGA TGA CAT ATG GCT CCA CTC TT         |
|              | Forward | TGG CTC CTG CCC CAT TAT C              |
| LL-37        | Forward | GAA GGA CGG GCT GGT GAA G              |
|              | Reverse | ACC CAG CAG GGC AAA TCT C              |
| H $\beta$ D1 | Forward | GTC GCC ATG AGA ACT TCC TAC C          |
|              | Reverse | CAT TGC CCT CCA CTG CTG AC             |
| H $\beta$ D2 | Reverse | GGT CCT TTT CAC CAG CAA GCT            |
|              | Forward | TGA TGC CTC TTC CAG GTG TTT            |
| H $\beta$ D3 | Forward | AGT GAC CAA GCA CAC CTT TTC A          |
|              | Reverse | CCA AAA ACA GGA AGA GCA AAG C          |
| H $\beta$ D4 | Forward | CCT GTT ACC TGC CTT AAG AGT G          |
|              | Reverse | GAA TCC GCA TCA GCC ACA G              |
| HD-5         | Forward | GAA TTC AGC ATG GCC ACC TGC TAT TGC    |
|              | Reverse | GCG GCC GCT CAG CGA CAG CAG AGT CTG TA |
| HD-6         | Forward | GCT TTG GGC TCA ACA AGG GCT TTC        |
|              | Reverse | GAC ACA CGA CAG TTT CCT TCT AGG TCA TA |
| HPRT         | Forward | TGA CAC TGG CAA AAC AAT GCA            |
|              | Reverse | GGT CCT TTT CAC CAG CAA GCT            |
| GAPDH        | Forward | ACC AGG TGG TCT CCT CTG AC             |
|              | Reverse | TGC TGT AGC CAA ATT CGT TG             |
| 18S          | Forward | CTT CCA CAG GAG GCC TAC AC             |
|              | Reverse | CGC AAA ATA TGC TGG AAC TTT            |
| TBP          | Forward | TTC TGG GAA AAT GGT GTG C              |
|              | Reverse | CCC ACC ATA TTC TGA ATC TT             |
| E7 HPV16     | Forward | AGC TCA GAG GAG GAG GAT GAA            |
|              | Reverse | GGT TAC AAT ATT GTA ATG GGC TC         |

### Mouse qRT-PCR

|              |         |                                |
|--------------|---------|--------------------------------|
| SLPI         | Forward | GGC CTT TTA CCT TTC ACG GTG    |
|              | Reverse | GGC TCC GAT TTT GAT AGC ATC AT |
| S100A7       | Forward | TTG GAT AGT GTG CCT CGC TT     |
|              | Reverse | CCG GAA CAG CTC TGT GAT GTA    |
| M $\beta$ D1 | Forward | AGG TGT TGG CAT TCT CAC AAG    |



|       |         |                                |
|-------|---------|--------------------------------|
| MβD4  | Reverse | GCT TAT CTG GTT TAC AGG TTC CC |
|       | Reverse | CTG TCT CCA CTT GCA GCC TT     |
| MβD12 | Forward | ATC TGT CGA AAA GCG GTA GGG    |
|       | Forward | GCA GAG AGG TGT TCT ATT TTG GT |
| MβD14 | Reverse | CAT GTC TCG CAC ACA GCA AT     |
|       | Forward | TCC AGG GGA CGC ATT CCT A      |
| MβD15 | Reverse | CAA GGC AGT TAA GTA CAG CAC A  |
|       | Forward | TGG AAA GAG CAA GAG CAA CCA    |
| HPRT  | Reverse | CAG GTG CCA CAA CAA AAG GA     |
|       | Forward | AGT CCC AGC GTC GTG ATT AG     |
| GAPDH | Reverse | TTT CCA AAT CCT CGG CAT AAT GA |
|       | Forward | CTC TCT TGC TCA GTG TCC TTG CT |
|       | Reverse | GGT GGA CCT CAT GGC CTA CA     |

### Bisulfite genomic sequencing

|                 |         |                                   |
|-----------------|---------|-----------------------------------|
| CDH1 (promoter) | Forward | TGG GTG AAA GAG TGA GAT TTT AT    |
|                 | Reverse | CAA ACT CAC AAA TAC TTT ACA ATT C |

### ChIP

|                            |          |                                 |
|----------------------------|----------|---------------------------------|
| Elafin (promoter)<br>-2 kb | Forward  | TCT TTA GGA GTG CAA TTG CTG A   |
|                            | Reversed | ATT TTA GAT TTG AAT GGG TTG TTT |
| NF-κB -153                 | Forward  | TGG GAC AAT CAG AGA TGA TGT GA  |
|                            | Reversed | GGG CGG GTC TGT GGT ATT TA      |
| HβD2 (promoter)<br>-2 kb   | Forward  | CAT CCT TTA CTG TGA TGA TGC CC  |
|                            | Reversed | AGC AGT CTA AAC CTG TGA CCA     |
| NF-κB -221                 | Forward  | CAC TCC ATT CAC ACA CTG GG      |
|                            | Reversed | AAG AAC AAT GCA CAC TCA GGA GA  |

### 16S-based metagenomics

|         |          |                                    |
|---------|----------|------------------------------------|
| V5-V6   | Forward  | NNN NNN NAG GAT TAG ATA CCC TGG TA |
|         | Reversed | CRR CAC GAG CTG ACG AC             |
| Adaptor | Forward  | TCGTCGGCAGCGTCAGATGTGTATAAGAGACAG  |
|         | Reversed | GTCTCGTGGGCTCGGAGATGTGTATAAGAGACAG |
